# Supplementary material for: An ultraflexible polyurethane yarn-based wearable strain sensor with a polydimethylsiloxane infiltrated multilayer sheath for smart textiles
Source: Royal Society of Chemistry journal article supplement (doi:10.1039/c9nr09306k), 2020-01-01
Supplement: c9nr09306k3.pdf [file c9nr09306k3.pdf]

## Ultraflexible polyurethane yarn-based wearable strain sensor with polydimethylsiloxane infiltrated multilayer sheath for smart textiles†

Xiaoting Li, Keng Huat Koh, Musthafa Farhan and King Wai Chiu Lai\*

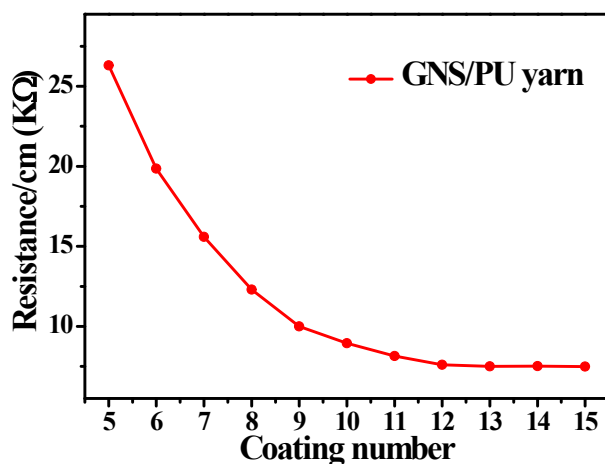

**Fig. S1** Resistance changes of GNS/ PU yarn with different number of GNS coating. The electrical resistance of GNS/PU yarn decreases with the increase of number of GNS coating (from 5 to 12) until it reaches to a stable condition (from 12 to 15). That is say, when the number of GNS coating increased to 12, the GNS layer has been achieved to a highly conductive and stable state, and thereby enabling the electro-mechanical properties reach to a stable state.

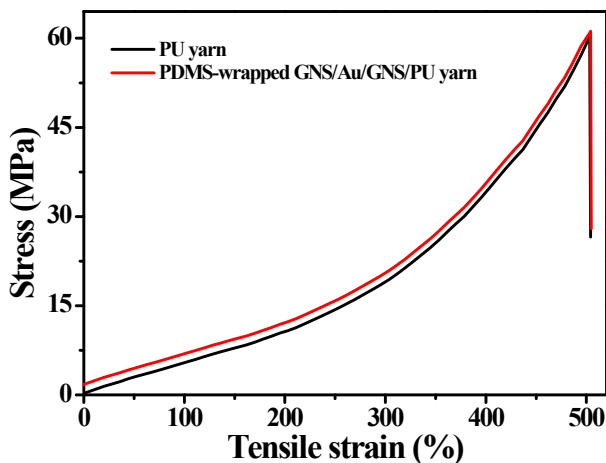

**Fig. S2** Tensile properties of PU yarn and the resultant PDMS-wrapped GNS/Au/GNS/PU yarn. It compares the stress-strain curves of the PU yarn and the resultant strain sensor. The PU yarn and the resultant strain sensor can be stretched to approximately 500% until breakage, which indicates that the multilayer sheath and PDMS wrapping layer had no apparent influence on the inherent outstanding mechanical property.

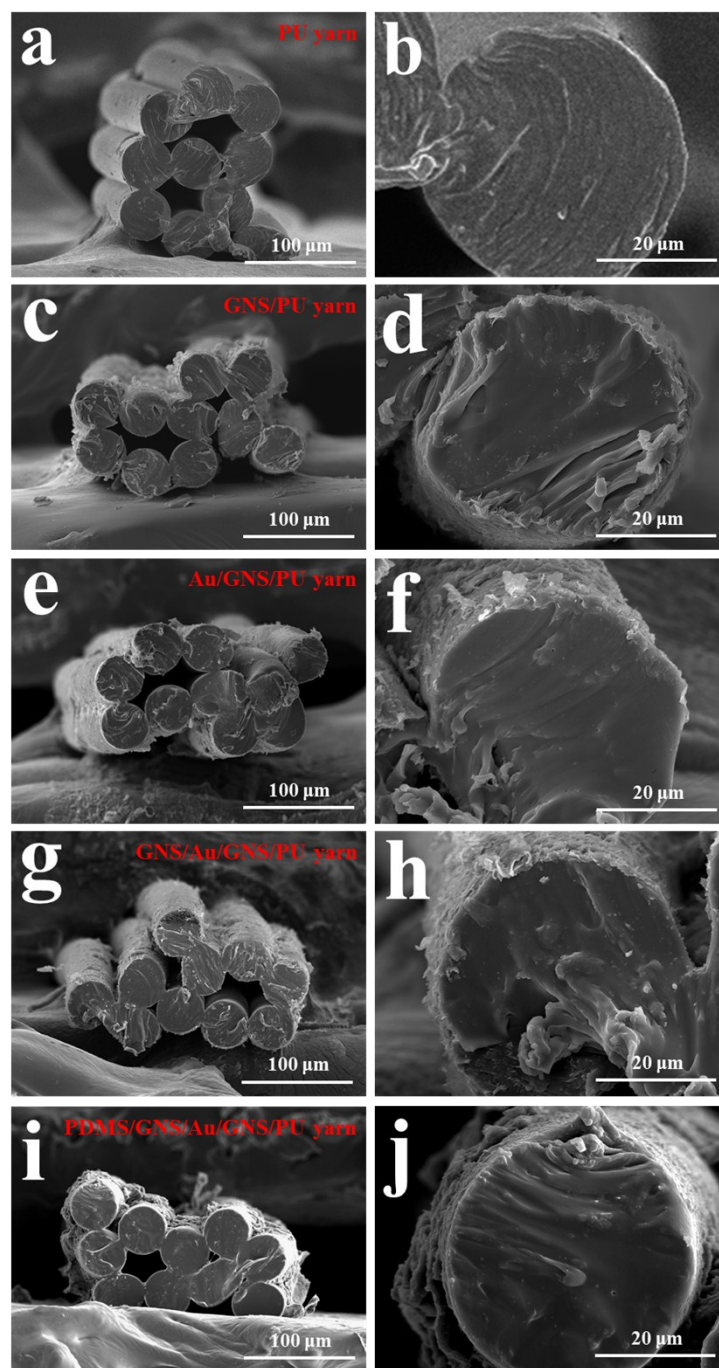

**Fig. S3** The cross-sectional FESEM images of (a, b) PU yarn, (c, d) GNS/PU yarn, (e, f) Au/GNS/PU yarn, (g, h) GNS/Au/GNS/PU yarn, and (i, j) PDMS-wrapped GNS/Au/GNS/PU yarn. The PU yarn is consisted of a group of monofilaments with average diameters of approximately 40  $\mu\text{m}$ .

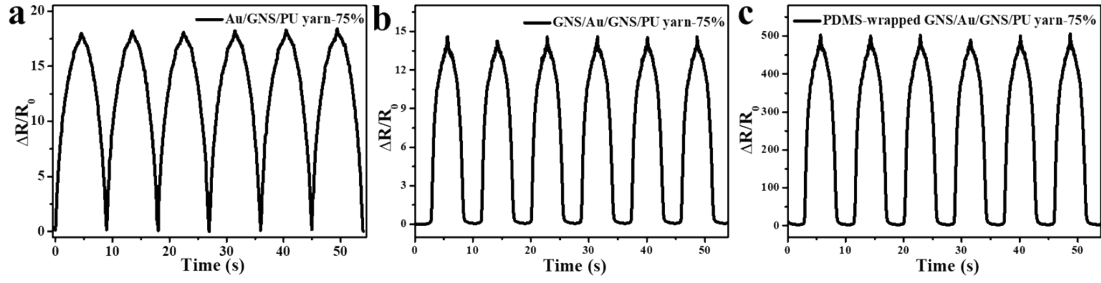

**Fig. S4** Resistance-time relationships under six stretching/releasing cycles with an applied strain of 75%: (a) Au/GNS/PU yarn (GF: 23.96), (b) GNS/Au/GNS/PU yarn (GF: 19.55), (c) PDMS-wrapped GNS/Au/GNS/PU yarn (GF: 668.33).

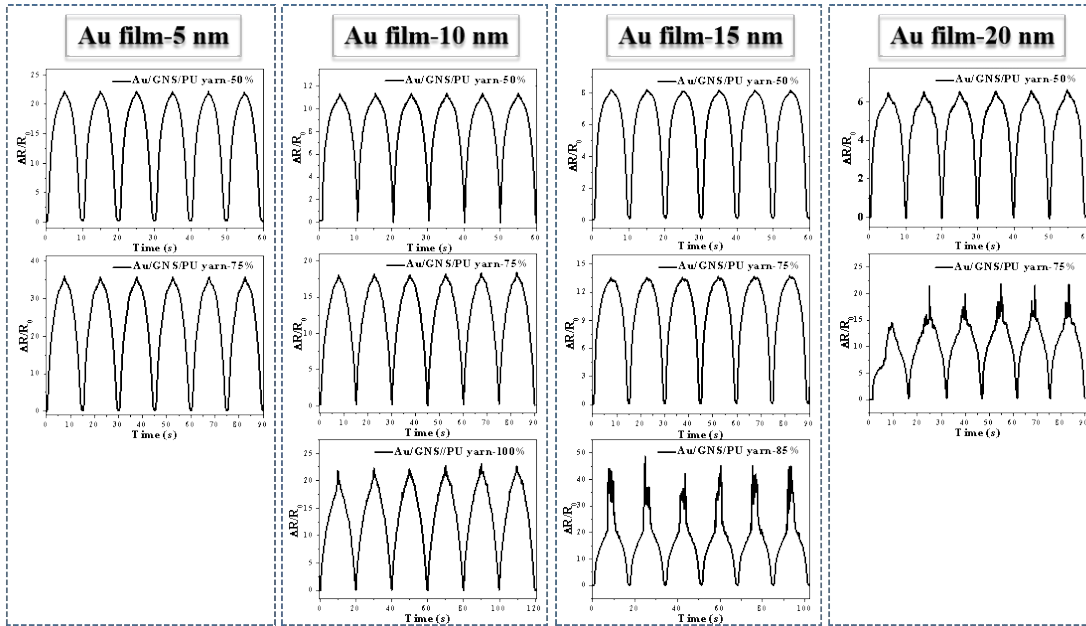

**Fig. S5** Electro-mechanical properties of Au/GNS/PU yarn with different thicknesses of Au films. Comparing with the GNS/PU yarns coated with 5 nm, 15 nm, and 20 nm Au films, the GNS/PU yarn coated with 10 nm Au film possesses a wider and more stable working (strain-sensing) range (up to 100%), therefore, in this manuscript, we chose the 10 nm Au film as the inter layer.

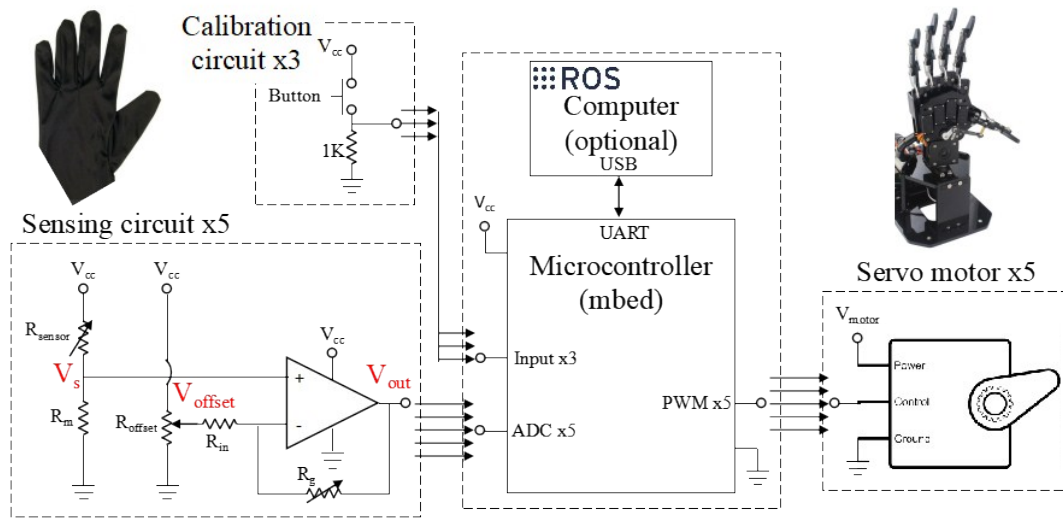

**Fig. S6** Schematic diagram of the wearable sensor platform for human-machine interface. Each strain sensor in the glove was connected to a sensing circuit and microcontroller to map the normalized signal voltage value into rotation angle of the servo motor on the corresponding finger of the robotic hand. A separate calibration circuit provides personalized tuning for the voltage mapping of the fingers. Optionally, the signals can be displayed on computer that runs Robot Operating System.

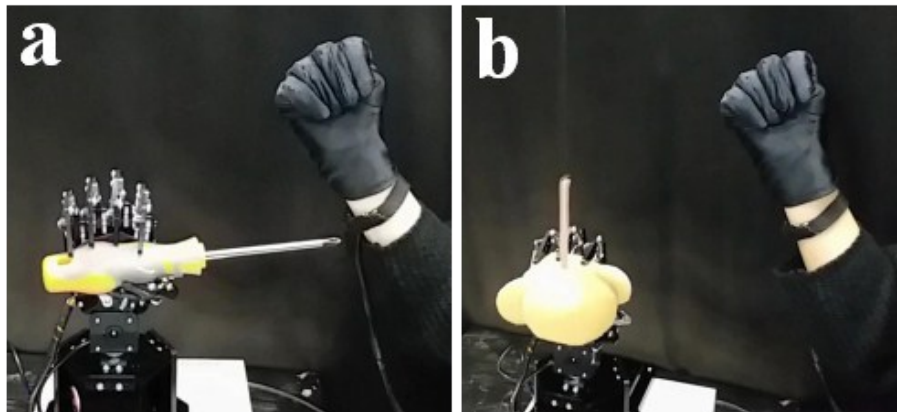

**Fig. S7** Photographs showing the smart glove control a hand robot to (a) hold still object and (b) grasp a moving toy.
